# Supplementary material for: Isotopic effects of nitrate photochemistry in snow: a field study at Dome C, Antarctica
Source: Copernicus journal article supplement (doi:10.5194/acp-15-11243-2015), 2015-10-09
Supplement: Supplementary file 1 [file acp-15-11243-2015-supplement.zip]

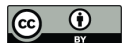

## *Supplement of*

# **Isotopic effects of nitrate photochemistry in snow: a field study at Dome C, Antarctica**

**T. A. Berhanu et al.**

*Correspondence to:* J. Savarino ([joel.savarino@ujf-grenoble.fr](mailto:joel.savarino@ujf-grenoble.fr))

- [acp-15-11243-2015-supplement-title-page.pdf](#)
- [Graves\\_data\\_conc.txt](#)
- [Graves\\_data\\_iso.txt](#)
- [SUPPLEMENTARY MATERIALS.pdf](#)

The copyright of individual parts of the supplement might differ from the CC-BY 3.0 licence.
